# Supplementary material
Source: Royal Society of Chemistry journal article supplement (doi:10.1039/d6ay00363j)
Supplement: d6ay00363j1.pdf [file d6ay00363j1.pdf]

## Supplementary Material

### Development and validation of an LC-MS/MS/MS method for the sensitive quantification of trace $\beta$ -agonists in complex animal-derived food matrices

Chujun Liu,<sup>a</sup> Jiankang Ren,<sup>a</sup> Qian Ran,<sup>a</sup> Yuliang Xu,<sup>b</sup> Boyan Sun,<sup>a</sup> Zhiyue Feng,<sup>a</sup> Sihan Wang,<sup>\*c</sup> Jie Xie

<sup>\*d</sup> and Haiyang Jiang <sup>\*a</sup>

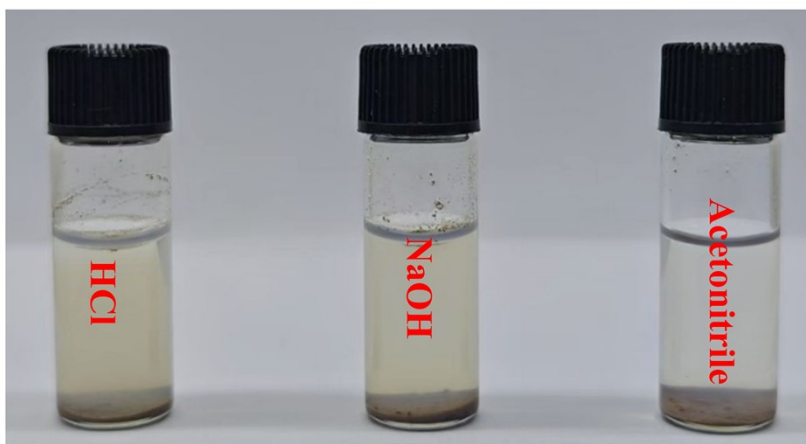

**Fig. S1.** The stability of  $\text{NH}_2\text{-UiO-66}$  after treatment with water, 0.1 M HCl, and 0.1 M NaOH for 24 h.

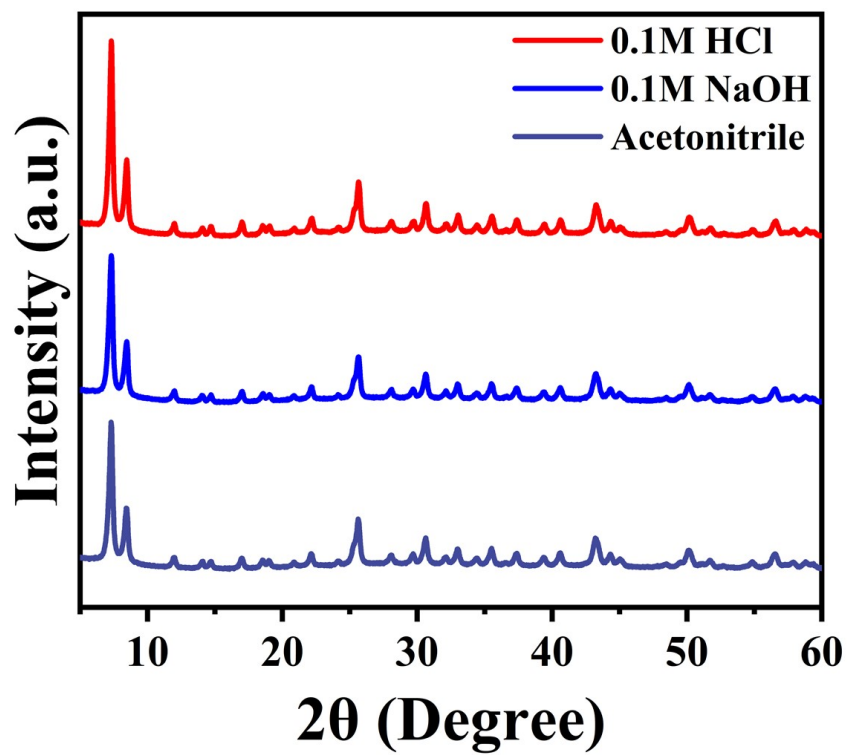

**Fig. S2.** XRD spectra of  $\text{NH}_2\text{-UiO-66}$  in different solvents.

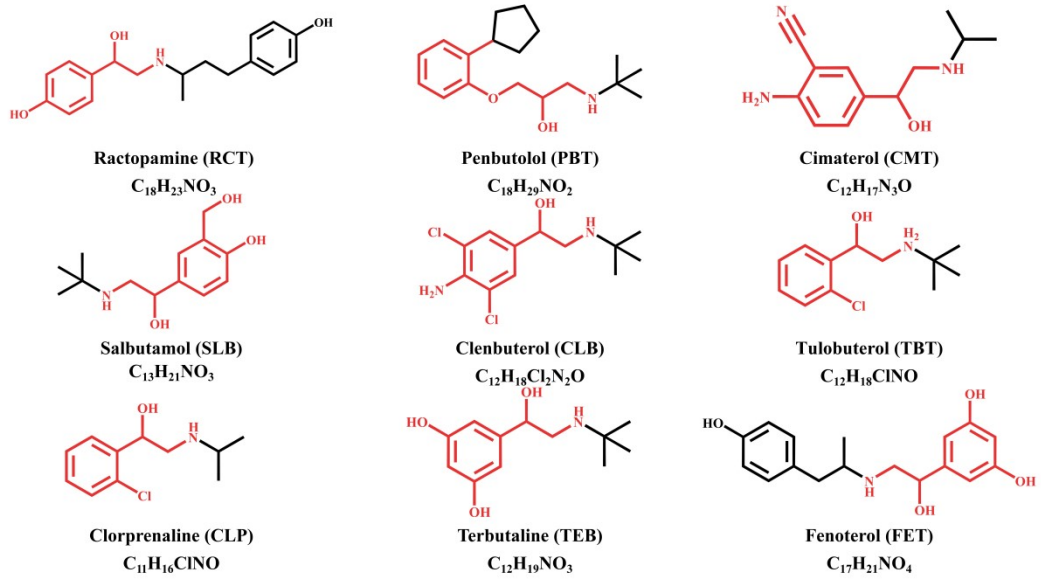

**Fig. S3.** Structures of the  $\beta$ -agonists.

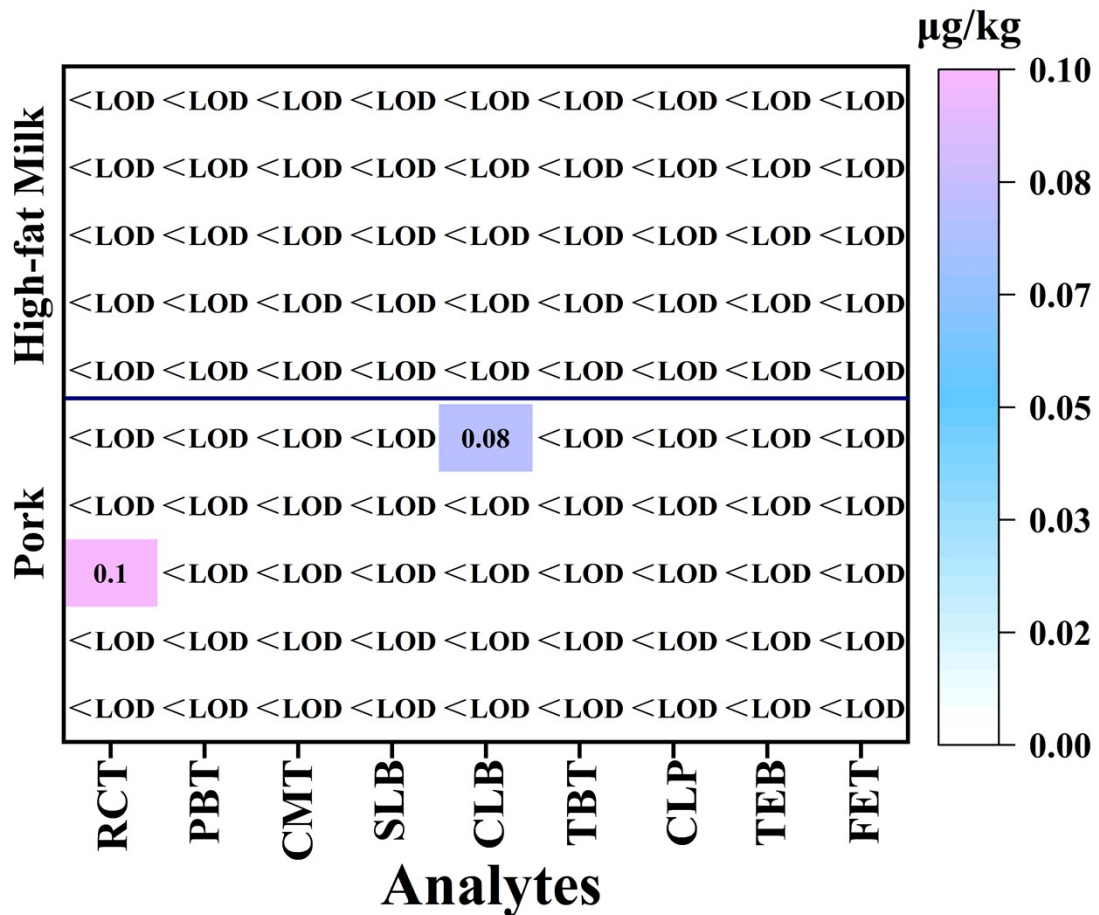

**Fig. S4.** The determination of  $\beta$ -agonists in real sample matrices.

**Table S1** The basic information of  $\beta$ -agonists.

| Analytes      | Abbreviation | CAS        | Molecular formula      |
|---------------|--------------|------------|------------------------|
| Ractopamine   | RCT          | 97825-25-7 | $C_{18}H_{23}NO_3$     |
| Penbutolol    | PBT          | 38363-40-5 | $C_{18}H_{29}NO_2$     |
| Cimaterol     | CMT          | 54239-37-1 | $C_{12}H_{17}N_3O$     |
| Salbutamol    | SLB          | 18559-94-9 | $C_{13}H_{21}NO_3$     |
| Clenbuterol   | CLB          | 37148-27-9 | $C_{12}H_{18}Cl_2N_2O$ |
| Tulobuterol   | TBT          | 41570-61-0 | $C_{12}H_{18}ClNO$     |
| Clorprenaline | CLP          | 3811-25-4  | $C_{11}H_{16}ClNO$     |
| Terbutaline   | TEB          | 23031-25-6 | $C_{12}H_{19}NO_3$     |
| Fenoterol     | FET          | 13392-18-2 | $C_{17}H_{21}NO_4$     |

**Table S2** MRM and MRM<sup>3</sup> parameters for nine  $\beta$ -agonists tested in ESI<sup>+</sup> mode.

| $\beta$ -agonists | MRM                     |           |           |           |            | MRM <sup>3</sup> |         |                         |               |                |
|-------------------|-------------------------|-----------|-----------|-----------|------------|------------------|---------|-------------------------|---------------|----------------|
|                   | Transition P→F<br>(m/z) | DP<br>(V) | EP<br>(V) | CE<br>(V) | CXP<br>(V) | F' (m/z)         | AF2 (V) | Excitation time<br>(ms) | LIT time (ms) | Q0<br>trapping |
| RCT               | 302.1→164.2             | 56        | 7         | 23        | 9          | 121.0            | 0.06    | 25                      | 15            | Yes            |
|                   | 302.1→107.1             | 47        | 8         | 49        | 10         | 79.1             | 0.10    | 25                      | 15            | Yes            |
| PBT               | 292.1→236.2             | 74        | 10        | 24        | 13         | 201.1            | 0.07    | 25                      | 20            | Yes            |
|                   | 292.1→201.1             | 117       | 6         | 29        | 18         | 133.1            | 0.06    | 25                      | 20            | Yes            |
| CMT               | 220.1→202.2             | 27        | 11        | 16.       | 11         | 160.1            | 0.06    | 25                      | 10            | Yes            |
|                   | 220.1→160.1             | 19        | 10        | 24        | 8          | 143.1            | 0.06    | 25                      | 15            | Yes            |
| SLB               | 240.2→222.2             | 78        | 7         | 16        | 15         | 148.1            | 0.04    | 25                      | 25            | Yes            |

|     |             |    |    |    |    |       |      |    |    |     |
|-----|-------------|----|----|----|----|-------|------|----|----|-----|
|     | 240.2→148.1 | 36 | 10 | 27 | 12 | 133.1 | 0.03 | 25 | 25 | Yes |
| CLB | 277.1→259.1 | 78 | 9  | 16 | 36 | 203.1 | 0.07 | 25 | 10 | Yes |
|     | 277.1→203.1 | 31 | 9  | 23 | 11 | 132.1 | 0.06 | 25 | 20 | Yes |
| TBT | 228.1→172.0 | 20 | 9  | 17 | 9  | 154.1 | 0.06 | 25 | 15 | Yes |
|     | 228.1→154.1 | 39 | 11 | 25 | 13 | 118.1 | 0.06 | 25 | 15 | Yes |
| CLP | 214.1→196.1 | 38 | 3  | 18 | 12 | 154.1 | 0.05 | 25 | 5  | Yes |
|     | 214.1→154.1 | 39 | 2  | 25 | 9  | 118.1 | 0.05 | 25 | 5  | Yes |
| TEB | 226.1→152.1 | 39 | 10 | 23 | 8  | 125.1 | 0.04 | 25 | 25 | Yes |
|     | 226.1→125.1 | 48 | 7  | 34 | 11 | 107.1 | 0.05 | 25 | 25 | Yes |
| FET | 304.1→135.1 | 30 | 11 | 25 | 14 | 107.0 | 0.05 | 25 | 20 | Yes |

|  |             |    |    |    |    |      |      |    |    |     |
|--|-------------|----|----|----|----|------|------|----|----|-----|
|  | 304.1→107.0 | 28 | 10 | 32 | 35 | 79.0 | 0.07 | 25 | 25 | Yes |
|--|-------------|----|----|----|----|------|------|----|----|-----|

**Table S3** The ion ratios of nine  $\beta$ -agonists in MRM and MRM<sup>3</sup> modes

| Analytes | MRM       |                    | MRM <sup>3</sup> |                    |
|----------|-----------|--------------------|------------------|--------------------|
|          | Ion ratio | Ion ratio (RSD, %) | Ion ratio        | Ion ratio (RSD, %) |
| RCT      | 0.56      | 1.92               | 0.02             | 4.66               |
| PBT      | 0.14      | 2.84               | 0.31             | 1.21               |
| CMT      | 0.66      | 3.93               | 0.88             | 1.49               |
| SLB      | 0.50      | 1.68               | 0.09             | 4.56               |
| CLB      | 0.62      | 1.25               | 0.74             | 1.14               |
| TBT      | 0.24      | 1.25               | 0.13             | 2.86               |
| CLP      | 0.94      | 0.34               | 0.91             | 1.10               |
| TEB      | 0.29      | 3.15               | 0.55             | 1.19               |
| FET      | 0.89      | 2.11               | 0.17             | 2.35               |
